# Supplementary material for: Anticoagulation trends in adults aged 65 years and over with atrial fibrillation: a cohort study
Source: PubMed Central journal article supplement (PMC8336116; doi:10.1136/openhrt-2021-001737), 2021-08-03
Supplement: openhrt-2021-001737supp001.pdf [file openhrt-2021-001737supp001.pdf]

## Appendices

### Appendix 1: CPRD codes defining exposure and outcomes

#### 1a: Atrial Fibrillation

| CPRD medcode | Readcode | Description                         |
|--------------|----------|-------------------------------------|
| 1268         | G573200  | Paroxysmal atrial fibrillation      |
| 1664         | G573000  | Atrial fibrillation                 |
| 1757         | G573100  | Atrial flutter                      |
| 2212         | G573.00  | Atrial fibrillation and flutter     |
| 23437        | G573z00  | Atrial fibrillation and flutter NOS |
| 35127        | G573300  | Non-rheumatic atrial fibrillation   |
| 96076        | G573500  | Persistent atrial fibrillation      |
| 96277        | G573400  | Permanent atrial fibrillation       |
| 107472       | G573600  | Paroxysmal atrial flutter           |

#### 1b: Anticoagulation

| CPRD prodcode | Product Name                                      | Drug substance                | Dose  | Anticoagulant Type |
|---------------|---------------------------------------------------|-------------------------------|-------|--------------------|
| 39119         | Rivaroxaban 10mg tablets                          | Rivaroxaban                   | 10mg  | DOAC               |
| 39444         | Dabigatran etexilate 110mg capsules               | Dabigatran etexilate mesilate | 110mg | DOAC               |
| 39503         | Dabigatran etexilate 75mg capsules                | Dabigatran etexilate mesilate | 75mg  | DOAC               |
| 39639         | Xarelto 10mg tablets (Bayer Plc)                  | Rivaroxaban                   | 10mg  | DOAC               |
| 39755         | Pradaxa 110mg capsules (Boehringer Ingelheim Ltd) | Dabigatran etexilate mesilate | 110mg | DOAC               |
| 42474         | Pradaxa 75mg capsules (Boehringer Ingelheim Ltd)  | Dabigatran etexilate mesilate | 75mg  | DOAC               |
| 46632         | Dabigatran etexilate 150mg capsules               | Dabigatran etexilate mesilate | 150mg | DOAC               |
| 46678         | Pradaxa 150mg capsules (Boehringer Ingelheim Ltd) | Dabigatran etexilate mesilate | 150mg | DOAC               |
| 47207         | Rivaroxaban 20mg tablets                          | Rivaroxaban                   | 20mg  | DOAC               |
| 47353         | Rivaroxaban 15mg tablets                          | Rivaroxaban                   | 15mg  | DOAC               |
| 47566         | Apixaban 2.5mg tablets                            | Apixaban                      | 2.5mg | DOAC               |
| 47925         | Xarelto 20mg tablets (Bayer Plc)                  | Rivaroxaban                   | 20mg  | DOAC               |
| 48134         | Xarelto 15mg tablets (Bayer Plc)                  | Rivaroxaban                   | 15mg  | DOAC               |

|       |                                                                  |                   |                  |          |
|-------|------------------------------------------------------------------|-------------------|------------------|----------|
| 48966 | Rivaroxaban 15mg tablets                                         | Rivaroxaban       | 15mg             | DOAC     |
| 53740 | Eliquis 2.5mg tablets (Bristol-Myers Squibb Pharmaceuticals Ltd) | Apixaban          | 2.5mg            | DOAC     |
| 54066 | Apixaban 5mg tablets                                             | Apixaban          | 5mg              | DOAC     |
| 54451 | Rivaroxaban 20mg tablets                                         | Rivaroxaban       | 20mg             | DOAC     |
| 56289 | Xarelto 20mg tablets (Bayer Plc)                                 | Rivaroxaban       | 20mg             | DOAC     |
| 56640 | Xarelto 15mg tablets (Bayer Plc)                                 | Rivaroxaban       | 15mg             | DOAC     |
| 58594 | Eliquis 5mg tablets (Bristol-Myers Squibb Pharmaceuticals Ltd)   | Apixaban          | 5mg              | DOAC     |
| 62150 | Rivaroxaban 2.5mg tablets                                        | Rivaroxaban       | 2.5mg            | DOAC     |
| 64500 | Xarelto 2.5mg tablets (Bayer Plc)                                | Rivaroxaban       | 2.5mg            | DOAC     |
| 64678 | Edoxaban 60mg tablets                                            | Edoxaban tosilate | 60mg             | DOAC     |
| 65247 | Edoxaban 30mg tablets                                            | Edoxaban tosilate | 30mg             | DOAC     |
| 65850 | Lixiana 60mg tablets (Daiichi Sankyo UK Ltd)                     | Edoxaban tosilate | 60mg             | DOAC     |
| 65876 | Edoxaban 15mg tablets                                            | Edoxaban tosilate | 15mg             | DOAC     |
| 45    | Warfarin 1mg tablets                                             | Warfarin sodium   | 1mg              | Warfarin |
| 61    | Warfarin 3mg tablets                                             | Warfarin sodium   | 3mg              | Warfarin |
| 833   | Warfarin 3mg/5ml oral solution                                   | Warfarin sodium   | 600microgram/1ml | Warfarin |
| 1781  | Warfarin 5mg tablets                                             | Warfarin sodium   | 5mg              | Warfarin |
| 6262  | Warfarin 500microgram tablets                                    | Warfarin sodium   | 500microgram     | Warfarin |
| 8466  | Marevan 1mg tablets (AMCo)                                       | Warfarin sodium   | 1mg              | Warfarin |
| 8467  | Marevan 3mg tablets (AMCo)                                       | Warfarin sodium   | 3mg              | Warfarin |
| 10560 | WARFARIN 10 MG TAB                                               |                   |                  | Warfarin |
| 13348 | Marevan 5mg tablets (AMCo)                                       | Warfarin sodium   | 5mg              | Warfarin |
| 17965 | Marevan 500microgram tablets (AMCo)                              | Warfarin sodium   | 500microgram     | Warfarin |
| 20754 | WARFARIN                                                         |                   |                  | Warfarin |
| 23078 | Warfarin 1mg Tablet (WB Pharmaceuticals Ltd)                     | Warfarin sodium   | 1mg              | Warfarin |
| 30202 | Warfarin wbp 1mg Tablet (Boehringer Ingelheim Ltd)               | Warfarin sodium   | 1mg              | Warfarin |
| 30203 | Warfarin wbp 3mg Tablet (Boehringer Ingelheim Ltd)               | Warfarin sodium   | 3mg              | Warfarin |
| 31511 | Warfarin 3mg Tablet (WB Pharmaceuticals Ltd)                     | Warfarin sodium   | 3mg              | Warfarin |

|       |                                                           |                 |                  |          |
|-------|-----------------------------------------------------------|-----------------|------------------|----------|
| 31937 | Warfarin 5mg tablets (Teva UK Ltd)                        | Warfarin sodium | 5mg              | Warfarin |
| 33711 | Warfarin 5mg Tablet (WB Pharmaceuticals Ltd)              | Warfarin sodium | 5mg              | Warfarin |
| 34019 | Warfarin 1mg tablets (IVAX Pharmaceuticals UK Ltd)        | Warfarin sodium | 1mg              | Warfarin |
| 34086 | Warfarin 3mg Tablet (Celltech Pharma Europe Ltd)          | Warfarin sodium | 3mg              | Warfarin |
| 34087 | Warfarin 1mg Tablet (Celltech Pharma Europe Ltd)          | Warfarin sodium | 1mg              | Warfarin |
| 34088 | Warfarin 5mg Tablet (Celltech Pharma Europe Ltd)          | Warfarin sodium | 5mg              | Warfarin |
| 34095 | Warfarin wbp 5mg Tablet (Boehringer Ingelheim Ltd)        | Warfarin sodium | 5mg              | Warfarin |
| 34299 | Warfarin 1mg tablets (Teva UK Ltd)                        | Warfarin sodium | 1mg              | Warfarin |
| 34416 | Warfarin 1mg tablets (Kent Pharmaceuticals Ltd)           | Warfarin sodium | 1mg              | Warfarin |
| 34417 | Warfarin 3mg tablets (Teva UK Ltd)                        | Warfarin sodium | 3mg              | Warfarin |
| 34418 | Warfarin 5mg tablets (Mylan)                              | Warfarin sodium | 5mg              | Warfarin |
| 34517 | Warfarin 1mg tablets (Mylan)                              | Warfarin sodium | 1mg              | Warfarin |
| 34526 | Warfarin 3mg tablets (Mylan)                              | Warfarin sodium | 3mg              | Warfarin |
| 34576 | Warfarin 1mg Tablet (Lagap)                               | Warfarin sodium | 1mg              | Warfarin |
| 34691 | Warfarin 5mg Tablet (Regent Laboratories Ltd)             | Warfarin sodium | 5mg              | Warfarin |
| 34758 | Warfarin 3mg tablets (IVAX Pharmaceuticals UK Ltd)        | Warfarin sodium | 3mg              | Warfarin |
| 34864 | Warfarin 5mg tablets (IVAX Pharmaceuticals UK Ltd)        | Warfarin sodium | 5mg              | Warfarin |
| 34918 | Warfarin 5mg tablets (Actavis UK Ltd)                     | Warfarin sodium | 5mg              | Warfarin |
| 36099 | Warfarin 1mg/5ml oral suspension                          | Warfarin sodium | 200microgram/1ml | Warfarin |
| 38041 | Warfarin sodium 5mg/ml oral suspension                    | Warfarin Sodium | 5mg/5ml          | Warfarin |
| 38044 | Warfarin 5mg/5ml oral solution                            | Warfarin sodium | 1mg/1ml          | Warfarin |
| 39866 | Warfarin 1mg tablets (Almus Pharmaceuticals Ltd)          | Warfarin sodium | 1mg              | Warfarin |
| 40143 | Warfarin 500microgram tablets (A A H Pharmaceuticals Ltd) | Warfarin sodium | 500microgram     | Warfarin |

|       |                                                                                     |                 |                  |          |
|-------|-------------------------------------------------------------------------------------|-----------------|------------------|----------|
| 43407 | Warfarin 3mg tablets (A A H Pharmaceuticals Ltd)                                    | Warfarin sodium | 3mg              | Warfarin |
| 43408 | Warfarin 1mg tablets (A A H Pharmaceuticals Ltd)                                    | Warfarin sodium | 1mg              | Warfarin |
| 43409 | Warfarin 5mg tablets (A A H Pharmaceuticals Ltd)                                    | Warfarin sodium | 5mg              | Warfarin |
| 43655 | Warfarin sodium oral solution                                                       | Warfarin Sodium |                  | Warfarin |
| 44866 | Warfarin sodium 1mg/ml oral suspension SF                                           | Warfarin Sodium | 1mg/ml           | Warfarin |
| 47944 | Warfarin 1mg tablets (Actavis UK Ltd)                                               | Warfarin sodium | 1mg              | Warfarin |
| 48070 | Warfarin sodium tablets                                                             | Warfarin Sodium |                  | Warfarin |
| 48869 | Warfarin 1mg/ml oral suspension sugar free                                          | Warfarin sodium | 1mg/1ml          | Warfarin |
| 50000 | Warfarin 1mg/ml oral suspension sugar free (A A H Pharmaceuticals Ltd)              | Warfarin sodium | 1mg/1ml          | Warfarin |
| 51484 | Warfarin 1mg tablets (Bristol Laboratories Ltd)                                     | Warfarin sodium | 1mg              | Warfarin |
| 51496 | Warfarin 1mg tablets (Phoenix Healthcare Distribution Ltd)                          | Warfarin sodium | 1mg              | Warfarin |
| 51509 | Warfarin 1mg tablets (APC Pharmaceuticals & Chemicals (Europe) Ltd)                 | Warfarin sodium | 1mg              | Warfarin |
| 53745 | Warfarin 3mg tablets (Bristol Laboratories Ltd)                                     | Warfarin sodium | 3mg              | Warfarin |
| 53752 | Warfarin 1mg tablets (Alliance Healthcare (Distribution) Ltd)                       | Warfarin sodium | 1mg              | Warfarin |
| 54892 | Warfarin 1mg/ml oral suspension sugar free (Alliance Healthcare (Distribution) Ltd) | Warfarin sodium | 1mg/1ml          | Warfarin |
| 54946 | Warfarin 3mg tablets (Actavis UK Ltd)                                               | Warfarin sodium | 3mg              | Warfarin |
| 55316 | Warfarin 3mg/5ml oral suspension                                                    | Warfarin sodium | 600microgram/1ml | Warfarin |
| 56314 | Warfarin 3mg tablets (Kent Pharmaceuticals Ltd)                                     | Warfarin sodium | 3mg              | Warfarin |
| 57032 | Warfarin 1mg/ml oral suspension sugar free (Rosemont Pharmaceuticals Ltd)           | Warfarin sodium | 1mg/1ml          | Warfarin |

|       |                                                                     |                 |              |          |
|-------|---------------------------------------------------------------------|-----------------|--------------|----------|
| 58519 | Warfarin 1mg tablets (DE Pharmaceuticals)                           | Warfarin sodium | 1mg          | Warfarin |
| 58787 | Warfarin 5mg tablets (Alliance Healthcare (Distribution) Ltd)       | Warfarin sodium | 5mg          | Warfarin |
| 58962 | Warfarin 3mg tablets (DE Pharmaceuticals)                           | Warfarin sodium | 3mg          | Warfarin |
| 59400 | Warfarin 500microgram tablets (Sigma Pharmaceuticals Plc)           | Warfarin sodium | 500microgram | Warfarin |
| 59578 | Warfarin 3mg tablets (Phoenix Healthcare Distribution Ltd)          | Warfarin sodium | 3mg          | Warfarin |
| 60589 | Warfarin 500microgram tablets (Actavis UK Ltd)                      | Warfarin sodium | 500microgram | Warfarin |
| 60949 | Warfarin 5mg/5ml oral suspension                                    | Warfarin sodium | 1mg/1ml      | Warfarin |
| 62309 | Warfarin 500microgram tablets (Kent Pharmaceuticals Ltd)            | Warfarin sodium | 500microgram | Warfarin |
| 62310 | Warfarin 500microgram tablets (AMCo)                                | Warfarin sodium | 500microgram | Warfarin |
| 63071 | Warfarin 4mg tablets                                                | Warfarin sodium | 4mg          | Warfarin |
| 65285 | Warfarin 1mg tablets (Crescent Pharma Ltd)                          | Warfarin sodium | 1mg          | Warfarin |
| 65496 | Warfarin 500microgram tablets (Phoenix Healthcare Distribution Ltd) | Warfarin sodium | 500microgram | Warfarin |
| 65746 | Warfarin 500microgram tablets (DE Pharmaceuticals)                  | Warfarin sodium | 500microgram | Warfarin |
